# Supplementary material for: Three iodocuprate hybrids symmetrically modulated by positional isomers and the chiral conformation of N-benzyl-methylpyridinium
Source: Royal Society of Chemistry journal article supplement (doi:10.1039/c6ra08692f), 2016-01-01
Supplement: c6ra08692f1.pdf [file c6ra08692f1.pdf]

# Symmetrically Modulated Three Iodocuprate Hybrids by Positional Isomer and Chiral Conformation of N-benzyl-methylpyridinium

Pengfei Hao, Yanrong Qiao, Tanlai Yu, Junju Shen, Fang Liu and Yunlong Fu\*

School of Chemistry & Material Science, Shanxi Normal University, Linfen 041004, P. R. China

## Supporting Information (SI)

Supporting Information Available: Infrared Spectroscopy (Fig. S1), the asymmetric unit diagrams (Fig. S2 for **1**, Fig. S3 for **2** and Fig. S4 for **3**), TG and DSC analyses (Fig. S5), MS for compounds **1**, **2** and **3** (Fig. S6), X-ray powder diffraction (XRPD) patterns (Fig. S7), optical absorption spectra at room temperature (Fig. S8), chiral conformations of **1**, **2** and **3** (Fig. S9, S10 and S11), photoluminescent emissions and excitations of **1**, **2** and **3** (Fig. S12), a summary of the crystal data (Table S1), selected bond lengths (Å) and angles (°) for **1**, **2** and **3** (Table S2), parameters of chiral conformations in the compounds **1-3** (Table S3), and selected TG-DTA-MS data for compounds **1-3** (Table S4).

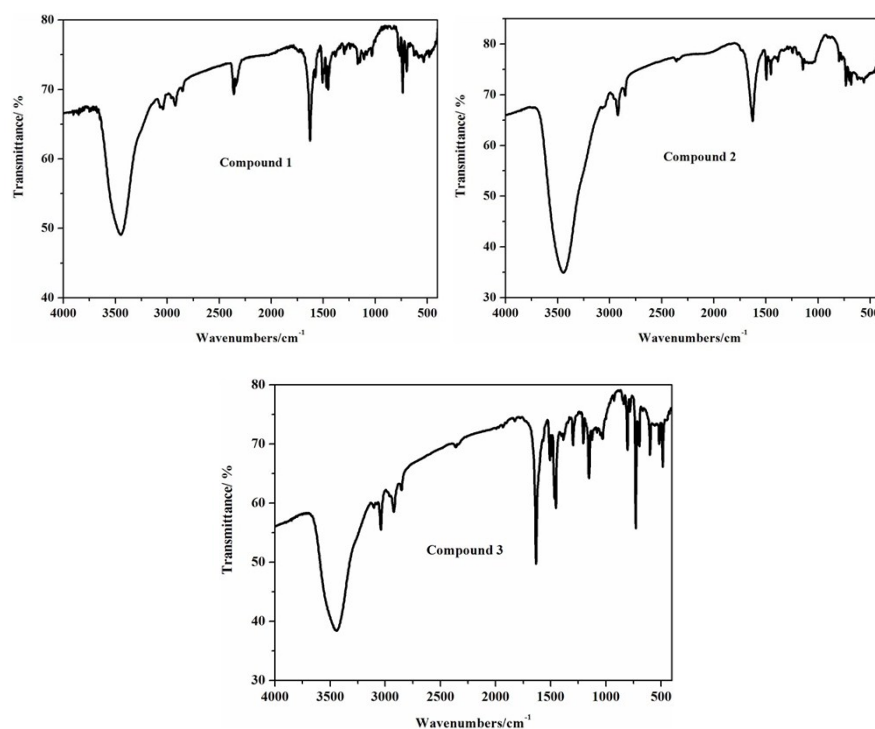

Fig. S1 IR spectra of **1**, **2** and **3**

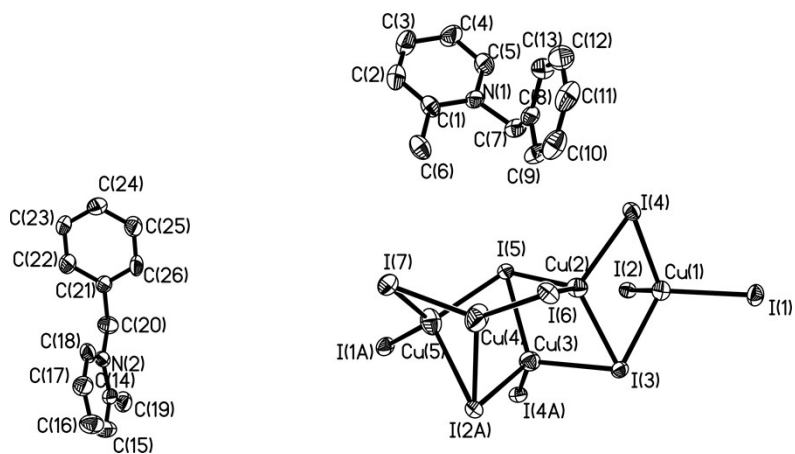

**Fig. S2** The asymmetric unit diagram of **1**

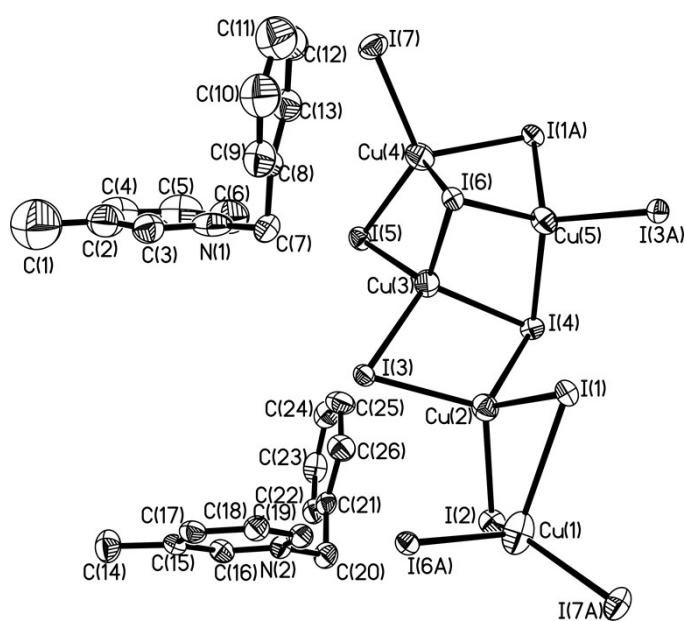

**Fig. S3** The asymmetric unit diagram of **2**

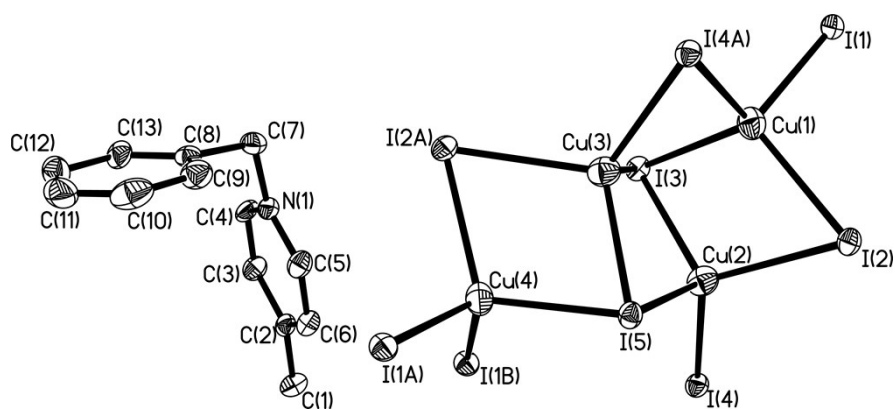

**Fig. S4** The asymmetric unit diagram of **3**

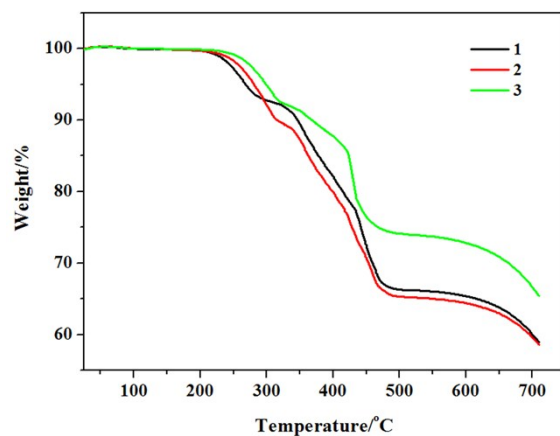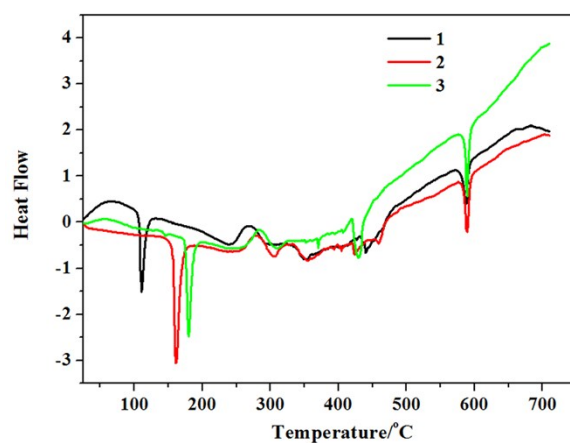

Fig. S5 TG curves (top) and DSC curves (bottom) for compounds 1, 2 and 3

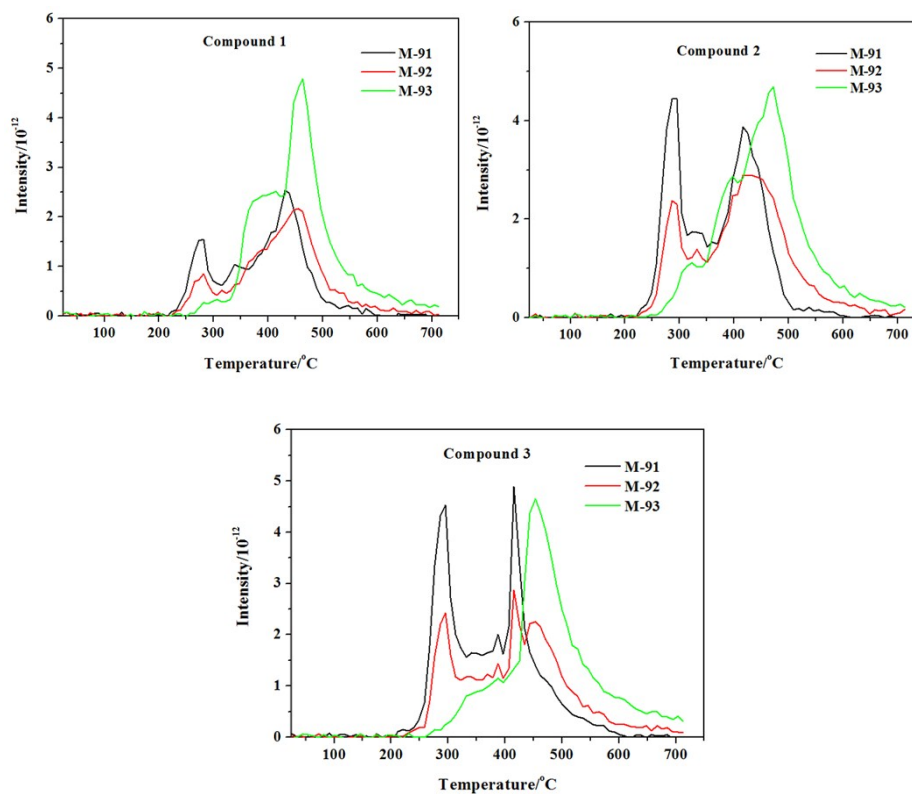

Fig. S6 MS for compounds 1 (top), 2 (middle) and 3 (bottom)

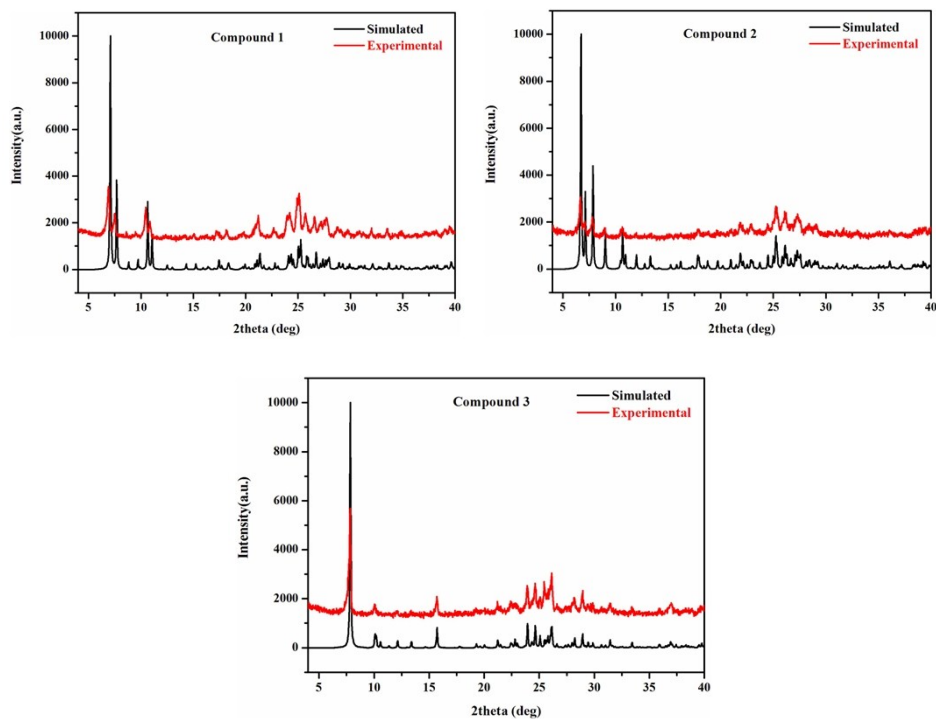

**Fig. S7** X-ray powder diffraction (XRPD) patterns of **1**, **2** and **3** at room temperature (RT).

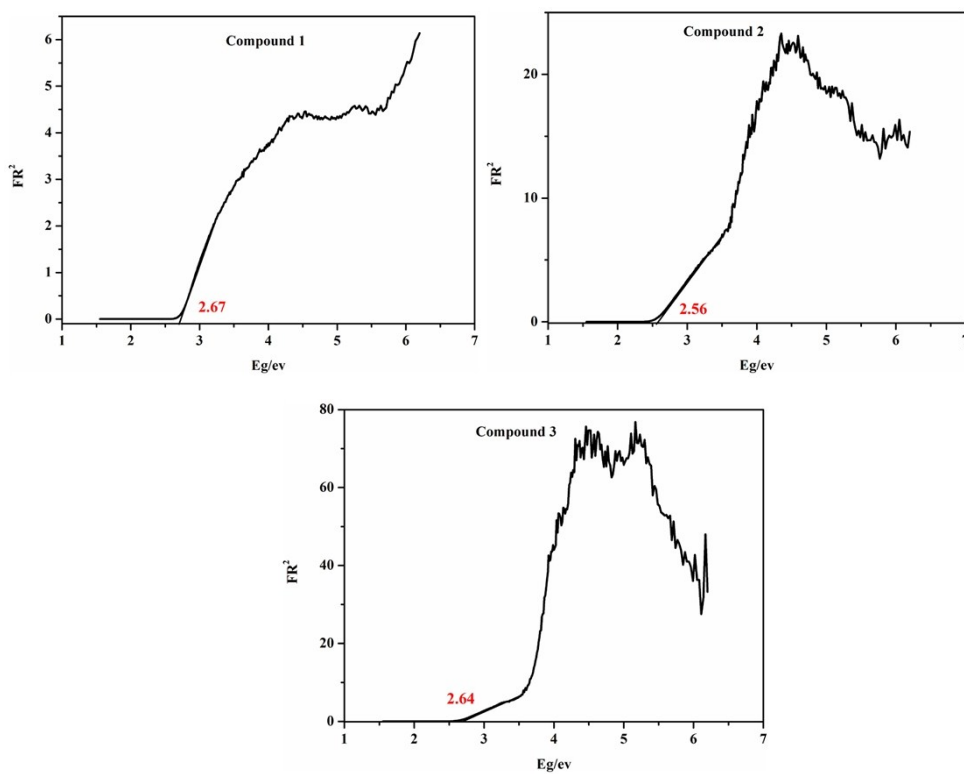

**Fig. S8** Optical absorption spectra of **1**, **2** and **3** at room temperature.

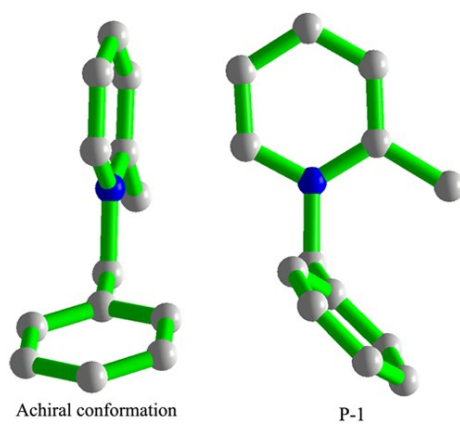

**Fig. S9** The two types of conformations in N-Bz-2-MePy<sup>+</sup>.

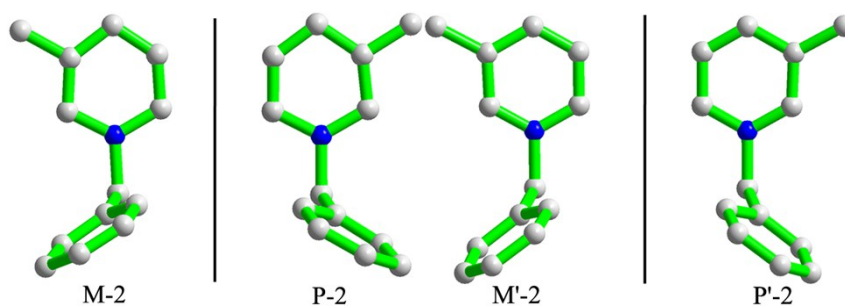

**Fig. S10** The four types of chiral conformations (that has mirror symmetry) in N-Bz-3-MePy<sup>+</sup>.

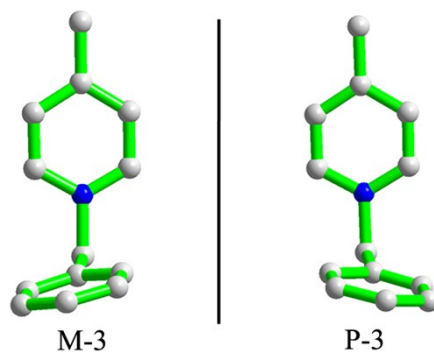

**Fig. S11** The two types of chiral conformations (that has mirror symmetry) in N-Bz-4-MePy<sup>+</sup>.

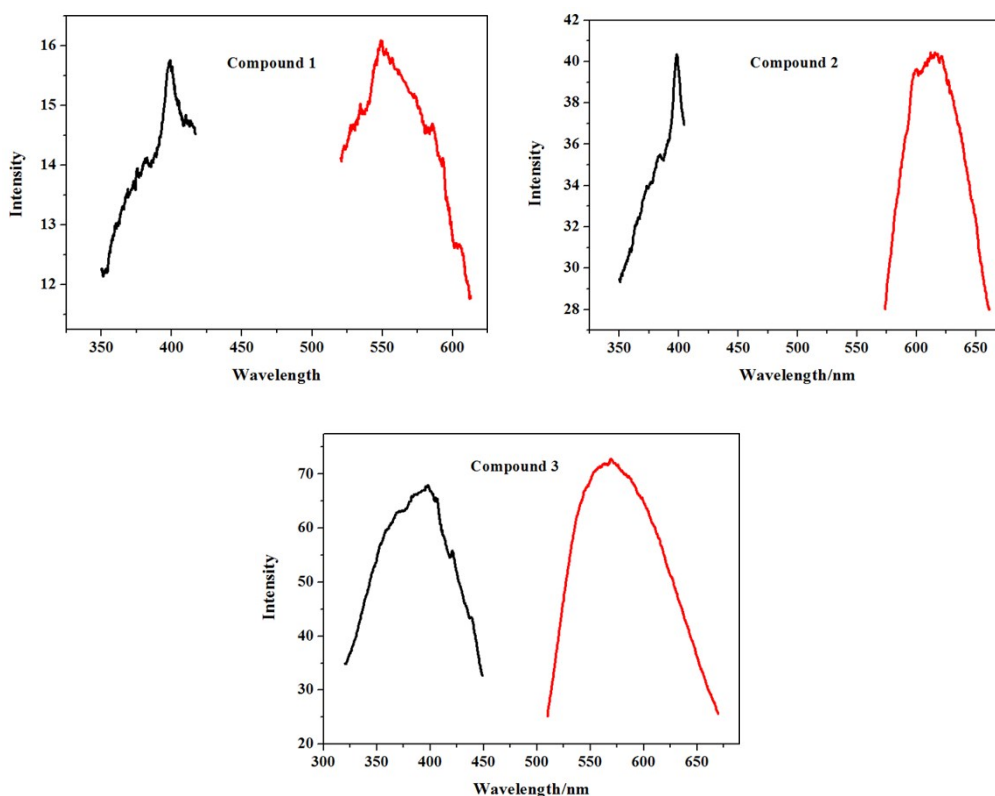

**Fig. S12** Photoluminescent emissions (red) and excitations (black) of **1**, **2** and **3**.

**Table S1** Crystal data and structure refinement for compounds **1-3**.

| Compound                                   | <b>1</b>                                                                      | <b>2</b>                                                                      | <b>3</b>                                                        |
|--------------------------------------------|-------------------------------------------------------------------------------|-------------------------------------------------------------------------------|-----------------------------------------------------------------|
| CCDC code                                  | 1449176                                                                       | 1449177                                                                       | 1449178                                                         |
| Temperature (K)                            | 293(2)                                                                        | 293(2)                                                                        | 293(2)                                                          |
| Formula                                    | C <sub>26</sub> H <sub>28</sub> N <sub>2</sub> Cu <sub>5</sub> I <sub>7</sub> | C <sub>26</sub> H <sub>28</sub> N <sub>2</sub> Cu <sub>5</sub> I <sub>7</sub> | C <sub>13</sub> H <sub>14</sub> NCu <sub>4</sub> I <sub>5</sub> |
| formula weight                             | 1574.50                                                                       | 1574.50                                                                       | 1072.91                                                         |
| crystal size (mm)                          | 0.19×0.09 × 0.08                                                              | 0.18 ×0.15 ×0.04                                                              | 0.18× 0.16 ×0.14                                                |
| crystal system                             | orthorhombic                                                                  | monoclinic                                                                    | monoclinic                                                      |
| space group                                | <i>P</i> 2 <sub>1</sub> 2 <sub>1</sub> 2 <sub>1</sub>                         | <i>P</i> 2 <sub>1</sub> / <i>n</i>                                            | <i>P</i> 2 <sub>1</sub> / <i>n</i>                              |
| <i>a</i> (Å)                               | 11.1175(3)                                                                    | 14.0832(3)                                                                    | 13.6325(3)                                                      |
| <i>b</i> (Å)                               | 14.8652(5)                                                                    | 10.6623(2)                                                                    | 10.78869(19)                                                    |
| <i>c</i> (Å)                               | 22.9914(7)                                                                    | 25.2274(6)                                                                    | 15.0331(3)                                                      |
| $\alpha$ (°)                               | 90                                                                            | 90                                                                            | 90                                                              |
| $\beta$ (°)                                | 90                                                                            | 100.572(2)                                                                    | 104.237(2)                                                      |
| $\gamma$ (°)                               | 90                                                                            | 90                                                                            | 90                                                              |
| <i>V</i> (Å <sup>3</sup> )                 | 3799.7(2)                                                                     | 3723.81(15)                                                                   | 2143.11(8)                                                      |
| <i>Z</i>                                   | 4                                                                             | 4                                                                             | 4                                                               |
| <i>D<sub>c</sub></i> (g cm <sup>-3</sup> ) | 2.752                                                                         | 2.808                                                                         | 3.325                                                           |
| <i>F</i> (000)                             | 2856                                                                          | 2856                                                                          | 1920                                                            |
| $\mu$ (mm <sup>-1</sup> )                  | 8.460                                                                         | 8.633                                                                         | 11.114                                                          |
| Flack parameter                            | -0.07(3)                                                                      | -                                                                             | -                                                               |
| reflections collected                      | 12950                                                                         | 18438                                                                         | 8669                                                            |
| unique reflections                         | 6845                                                                          | 7314                                                                          | 4215                                                            |

|                                                                                                       |                |                |                |
|-------------------------------------------------------------------------------------------------------|----------------|----------------|----------------|
| <i>R</i> <sub>int</sub>                                                                               | 0.0249         | 0.0260         | 0.0273         |
| goodness-of-fit on <i>F</i> <sup>2</sup>                                                              | 1.041          | 1.071          | 1.048          |
| <i>R</i> <sub>1</sub> / <i>wR</i> <sub>2</sub> , [ <i>F</i> ≥ 2σ <sub><i>i</i></sub> ] <sup>a,b</sup> | 0.0321, 0.0532 | 0.0397, 0.0767 | 0.0320, 0.0710 |
| <i>R</i> <sub>1</sub> / <i>wR</i> <sub>2</sub> , (all data)                                           | 0.0424, 0.0573 | 0.0543, 0.0823 | 0.0418, 0.0765 |
| Δρ <sub>max</sub> , Δρ <sub>min</sub> (e Å <sup>-3</sup> )                                            | 0.990, -0.846  | 1.811, -0.952  | 1.280, -1.073  |

<sup>a</sup> *R*<sub>1</sub> = Σ||*F*<sub>o</sub>|-|*F*<sub>c</sub>||/Σ|*F*<sub>o</sub>|, <sup>b</sup> *wR*<sub>2</sub> = [Σ*w*(*F*<sub>o</sub><sup>2</sup>-*F*<sub>c</sub><sup>2</sup>)<sup>2</sup>/Σ*w*(*F*<sub>o</sub><sup>2</sup>)<sup>2</sup>]<sup>1/2</sup>

**Table S2** Selected bond lengths (Å) and angles (°) for **1**, **2** and **3**.

| Compound 1          |            |                   |            |
|---------------------|------------|-------------------|------------|
| Cu(1)-I(1)          | 2.6561(11) | Cu(1)-I(2)        | 2.7231(13) |
| Cu(1)-I(3)          | 2.6892(12) | Cu(1)-I(4)        | 2.6616(13) |
| Cu(2)-I(3)          | 2.6752(12) | Cu(2)-I(4)        | 2.6557(11) |
| Cu(2)-I(5)          | 2.6912(11) | Cu(2)-I(6)        | 2.6180(14) |
| Cu(3)-I(2)#2        | 2.6926(13) | Cu(3)-I(3)        | 2.6779(11) |
| Cu(3)-I(4)#2        | 2.6616(14) | Cu(3)-I(5)        | 2.6860(12) |
| Cu(4)-I(2)#2        | 2.6596(16) | Cu(4)-I(6)        | 2.4959(14) |
| Cu(4)-I(5)          | 3.1720(2)  | Cu(4)-I(7)        | 2.6122(15) |
| Cu(5)-I(1)#2        | 2.5246(14) | Cu(5)-I(2)#2      | 3.0386(15) |
| Cu(5)-I(5)          | 2.6762(14) | Cu(5)-I(7)        | 2.6735(17) |
| Cu(1)-Cu(2)         | 2.8451(16) | Cu(1)-Cu(3)#1     | 2.9265(15) |
| Cu(1)-Cu(5)#1       | 2.8691(19) | Cu(2)-Cu(3)       | 2.8860(16) |
| Cu(3)-Cu(1)#2       | 2.9265(15) | Cu(4)-Cu(5)       | 2.4836(19) |
| Cu(5)-Cu(1)#2       | 2.8691(19) |                   |            |
| I(1)-Cu(1)-I(2)     | 115.43(5)  | I(1)-Cu(1)-I(3)   | 111.37(4)  |
| I(1)-Cu(1)-I(4)     | 108.10(4)  | I(3)-Cu(1)-I(2)   | 100.21(4)  |
| I(4)-Cu(1)-I(2)     | 108.26(4)  | I(4)-Cu(1)-I(3)   | 113.44(5)  |
| I(3)-Cu(2)-I(5)     | 110.19(4)  | I(4)-Cu(2)-I(3)   | 114.09(4)  |
| I(4)-Cu(2)-I(5)     | 102.61(4)  | I(6)-Cu(2)-I(3)   | 107.76(4)  |
| I(6)-Cu(2)-I(4)     | 110.07(5)  | I(6)-Cu(2)-I(5)   | 112.16(4)  |
| I(1)#2-Cu(5)-I(2)#2 | 109.32(5)  | I(3)-Cu(3)-I(2)#2 | 107.31(4)  |
| I(3)-Cu(3)-I(5)     | 110.26(4)  | I(4)#2-Cu(3)-I(3) | 112.41(5)  |
| I(4)#2-Cu(3)-I(2)#2 | 109.18(4)  | I(4)#2-Cu(3)-I(5) | 105.86(4)  |
| I(5)-Cu(3)-I(2)#2   | 111.88(5)  | I(6)-Cu(4)-I(2)#2 | 116.54(5)  |
| I(6)-Cu(4)-I(7)     | 126.92(7)  | I(7)-Cu(4)-I(2)#2 | 108.41(5)  |
| I(1)#2-Cu(5)-I(5)   | 114.89(6)  | I(1)#2-Cu(5)-I(7) | 121.08(5)  |
| I(5)-Cu(5)-I(2)#2   | 102.29(4)  | I(7)-Cu(5)-I(2)#2 | 96.73(5)   |
| I(7)-Cu(5)-I(5)     | 109.31(5)  |                   |            |
| Compound 2          |            |                   |            |
| Cu(1)-I(1)          | 3.0609(19) | Cu(1)-I(2)        | 2.5278(14) |
| Cu(1)-I(6)#1        | 2.6789(16) | Cu(1)-I(7)#1      | 2.5936(16) |
| Cu(2)-I(1)          | 2.7169(13) | Cu(2)-I(2)        | 2.6598(13) |

|              |            |              |            |
|--------------|------------|--------------|------------|
| Cu(2)-I(3)   | 2.6628(13) | Cu(2)-I(4)   | 2.6536(13) |
| Cu(3)-I(3)   | 2.6657(12) | Cu(3)-I(4)   | 2.6832(13) |
| Cu(3)-I(5)   | 2.5995(13) | Cu(3)-I(6)   | 2.7713(14) |
| Cu(4)-I(1)#2 | 2.7004(16) | Cu(4)-I(5)   | 2.5081(14) |
| Cu(4)-I(6)   | 3.0590(17) | Cu(4)-I(7)   | 2.6140(15) |
| Cu(5)-I(1)#2 | 2.7018(13) | Cu(5)-I(3)#2 | 2.6509(13) |
| Cu(5)-I(4)   | 2.6484(13) | Cu(5)-I(6)   | 2.6865(13) |

|               |            |               |            |
|---------------|------------|---------------|------------|
| Cu(1)-Cu(2)   | 2.998(2)   | Cu(1)-Cu(4)#1 | 2.5248(19) |
| Cu(2)-Cu(3)   | 2.9974(17) | Cu(2)-Cu(5)#1 | 2.8526(17) |
| Cu(3)-Cu(4)   | 2.8506(19) | Cu(3)-Cu(5)   | 2.8341(17) |
| Cu(4)-Cu(1)#2 | 2.5248(19) | Cu(5)-Cu(2)#2 | 2.8526(17) |

|                   |           |                     |           |
|-------------------|-----------|---------------------|-----------|
| I(2)-Cu(1)-I(1)   | 104.99(6) | I(2)-Cu(1)-I(6)#1   | 113.90(6) |
| I(2)-Cu(1)-I(7)#1 | 127.59(6) | I(6)#1-Cu(1)-I(1)   | 99.44(5)  |
| I(7)#1-Cu(1)-I(1) | 97.13(5)  | I(7)#1-Cu(1)-I(6)#1 | 108.26(6) |
| I(2)-Cu(2)-I(1)   | 111.53(5) | I(2)-Cu(2)-I(3)     | 111.61(5) |
| I(3)-Cu(2)-I(1)   | 111.01(4) | I(4)-Cu(2)-I(1)     | 102.41(4) |
| I(4)-Cu(2)-I(2)   | 109.36(4) | I(4)-Cu(2)-I(3)     | 110.55(5) |
| I(3)-Cu(3)-I(4)   | 109.55(4) | I(3)-Cu(3)-I(6)     | 99.27(4)  |
| I(4)-Cu(3)-I(6)   | 109.70(4) | I(5)-Cu(3)-I(3)     | 110.58(5) |
| I(5)-Cu(3)-I(4)   | 112.33(5) | I(5)-Cu(3)-I(6)     | 114.62(5) |
| I(1)#2-Cu(4)-I(6) | 99.01(5)  | I(5)-Cu(4)-I(1)#2   | 118.21(6) |
| I(5)-Cu(4)-I(6)   | 108.19(5) | I(5)-Cu(4)-I(7)     | 123.05(6) |
| I(7)-Cu(4)-I(1)#2 | 106.21(5) | I(7)-Cu(4)-I(6)     | 97.42(5)  |
| I(3)#2-Cu(5)-I(6) | 104.63(4) | I(3)#2-Cu(5)-I(1)#2 | 111.86(4) |
| I(4)-Cu(5)-I(1)#2 | 106.96(4) | I(4)-Cu(5)-I(3)#2   | 111.04(5) |
| I(4)-Cu(5)-I(6)   | 113.45(5) | I(6)-Cu(5)-I(1)#2   | 108.97(5) |

---

**Compound 3**

---

|              |            |              |            |
|--------------|------------|--------------|------------|
| Cu(1)-I(1)   | 2.6495(11) | Cu(1)-I(2)   | 2.7157(11) |
| Cu(1)-I(3)   | 2.6592(11) | Cu(1)-I(4)#1 | 2.6694(10) |
| Cu(2)-I(2)   | 2.7367(11) | Cu(2)-I(3)   | 2.6796(11) |
| Cu(2)-I(4)   | 2.6415(10) | Cu(2)-I(5)   | 2.6488(10) |
| Cu(3)-I(2)#1 | 2.7801(11) | Cu(3)-I(3)   | 2.6842(10) |
| Cu(3)-I(4)#1 | 2.6495(10) | Cu(3)-I(5)   | 2.6448(11) |
| Cu(4)-I(1)#1 | 2.6756(11) | Cu(4)-I(1)#4 | 2.6802(10) |
| Cu(4)-I(2)#1 | 2.7114(11) | Cu(4)-I(5)   | 2.6042(10) |

|               |            |               |            |
|---------------|------------|---------------|------------|
| Cu(1)-Cu(2)   | 2.9111(14) | Cu(1)-Cu(3)   | 2.8907(13) |
| Cu(1)-Cu(4)#2 | 3.0180(13) | Cu(2)-Cu(3)   | 2.8760(13) |
| Cu(2)-Cu(3)#2 | 2.7356(12) | Cu(3)-Cu(2)#1 | 2.7356(12) |
| Cu(4)-Cu(1)#1 | 3.0180(13) | Cu(4)-Cu(4)#3 | 2.6532(18) |

|                 |           |                 |           |
|-----------------|-----------|-----------------|-----------|
| I(1)-Cu(1)-I(2) | 107.10(3) | I(1)-Cu(1)-I(3) | 109.77(4) |
|-----------------|-----------|-----------------|-----------|



|                     |           |                     |           |
|---------------------|-----------|---------------------|-----------|
| I(1)-Cu(1)-I(4)#1   | 110.70(4) | I(3)-Cu(1)-I(2)     | 112.69(4) |
| I(3)-Cu(1)-I(4)#1   | 106.18(3) | I(4)#1-Cu(1)-I(2)   | 110.44(4) |
| I(3)-Cu(2)-I(2)     | 111.39(4) | I(4)-Cu(2)-I(2)     | 116.48(4) |
| I(4)-Cu(2)-I(3)     | 103.40(4) | I(4)-Cu(2)-I(5)     | 114.42(4) |
| I(5)-Cu(2)-I(2)     | 100.06(4) | I(5)-Cu(2)-I(3)     | 111.41(3) |
| I(3)-Cu(3)-I(2)#1   | 102.29(4) | I(4)#1-Cu(3)-I(2)#1 | 114.74(3) |
| I(4)#1-Cu(3)-I(3)   | 106.03(4) | I(5)-Cu(3)-I(2)#1   | 107.60(4) |
| I(5)-Cu(3)-I(3)     | 111.39(3) | I(5)-Cu(3)-I(4)#1   | 114.18(4) |
| I(1)#1-Cu(4)-I(1)#4 | 120.61(3) | I(1)#1-Cu(4)-I(2)#1 | 106.48(3) |
| I(1)#4-Cu(4)-I(2)#1 | 103.85(4) | I(5)-Cu(4)-I(1)#1   | 110.08(4) |
| I(5)-Cu(4)-I(2)#1   | 110.90(3) | I(5)-Cu(4)-I(1)#4   | 104.69(3) |

Symmetry code:

**1:** #1  $x-1/2, -y+1/2, -z$ ; #2  $x+1/2, -y+1/2, -z$ .

**2:** #1  $-x+3/2, y+1/2, -z+1/2$ ; #2  $-x+3/2, y-1/2, -z+1/2$ .

**3:** #1  $-x+1/2, y-1/2, -z+3/2$ ; #2  $-x+1/2, y+1/2, -z+3/2$ ; #3  $-x+1, -y+1, -z+2$ ; #4  $x+1/2, -y+3/2, z+1/2$ ; #5  $x-1/2, -y+3/2, z-1/2$ .

**Table S3** The angles that two aromatic rings make with the C-C-N plane and the angles between two aromatic rings in the compounds **1-3**

|                                                                 | N-Bz-2-MePy <sup>+</sup> in <b>1</b> | N-Bz-3-MePy <sup>+</sup> in <b>2</b> | N-Bz-4-MePy <sup>+</sup> in <b>3</b> |
|-----------------------------------------------------------------|--------------------------------------|--------------------------------------|--------------------------------------|
| The angles between the pyridine rings and C-C-N reference plane | 8.309(920)°<br>76.485(862)°          | 74.727(625)°<br>71.971(628)°         | 77.642(462)°                         |
| The angles between the phenyl rings and C-C-N reference plane   | 83.928(819)°<br>52.775(710)°         | 64.964(785)°<br>60.035(523)°         | 79.316(431)°                         |
| The angles between the phenyl and pyridine rings                | 88.189(391)°<br>80.262(366)°         | 82.409(380)°<br>80.823(228)°         | 82.168(178)°                         |

**Table S4** Selected TG-DTA-MS data for compounds **1-3**.

|                                                         | <b>1</b>           | <b>2</b>                   | <b>3</b>      |
|---------------------------------------------------------|--------------------|----------------------------|---------------|
| Decomposition Temp. (°C)                                | 210                | 230                        | 245           |
| Total weight loss (%)                                   | 37.8               | 38.1                       | 28.2          |
| Endothermic peaks (°C)                                  | 112, 350, 440, 588 | 161, 305, 355, 424,<br>589 | 180, 429, 588 |
| Exothermic peaks (°C)                                   | 269                | 280                        | 284           |
| Range of temp. for loss of<br>benzyl group in MS (°C)   | 245-580            | 230-585                    | 230-575       |
| Range of temp. for loss of<br>methylpyridine in MS (°C) | 282-620            | 275-630                    | 295-660       |
